# Supplementary material for: Functional MRI Studies in Friedreich's Ataxia: A Systematic Review
Source: Frontiers journal article supplement (doi:10.3389/fneur.2021.802496), 2022-03-10
Supplement: Table_1.pdf [file Table_1.pdf]

**S1 Table 1 Psychological and cognitive investigation, findings and correlations**

| <i>Reference</i>                         | <b>Cognitive, Psychological measures</b>                                                                                                                    | <b>Cognition/Psy findings</b>                                                                                                                                                                                                                                                                                          |
|------------------------------------------|-------------------------------------------------------------------------------------------------------------------------------------------------------------|------------------------------------------------------------------------------------------------------------------------------------------------------------------------------------------------------------------------------------------------------------------------------------------------------------------------|
| <b>Mantovan et al., 2006</b>             | Cognitive assessment, Language, Memory, Calculations, RT for Finger tapping, Attention/Information Processing/Planning, Implicit Learning Task, Personality | Normal cognitive assessment. Impaired: mean verbal fluency, short-term verbal memory, visual memory, slower at movement programming, poor learning capacity. Personality: increased irritability, poor impulsive control, blunting of affect, poor self-portraying.                                                    |
| <b>Ginestroni et al., 2012</b>           | none                                                                                                                                                        | n.a.                                                                                                                                                                                                                                                                                                                   |
| <b>Akhalaghi et al., 2012</b>            | BDI: FRDA 7±7.9, HC 3.7±4.7                                                                                                                                 | No differences in BDI intergroup.                                                                                                                                                                                                                                                                                      |
| <b>Georgiou-Karistianis et al., 2012</b> | BDI: 7±7.9 FRDA vs 3.7±4.7 HC, NART cognitive assessment score 117.1±3.1 FRDA vs 121.5±2.6 HC                                                               | Pre-morbid cognitive assessment in FRDA. Greater Simon effect difference (incongruent minus congruent) in FRDA vs HC.                                                                                                                                                                                                  |
| <b>Stefanescu et al., 2015</b>           | none                                                                                                                                                        | n.a.                                                                                                                                                                                                                                                                                                                   |
| <b>Dogan et al., 2016</b>                | HADS: FRDA 10.2 ± 6.28, HC 6.27 ± 4.71                                                                                                                      | Impaired phonemic and semantic verbal fluency, working memory, attention and social cognition. Social cognition deficit.                                                                                                                                                                                               |
| <b>Harding et al., 2016</b>              | BDI, N-Back Task (RT magnitude, RT variance, accuracy), NART                                                                                                | HC: Task performance and rIPFC activations in cerebral cortex correlated for SD and RT, anterior insula for SD and trending to significance for RT, more variable and/or poorer task performance.<br>Task-related cerebello-insular dynamic connectivity in L hemisphere correlated to behavioral variance in HC only. |
| <b>Harding et al., 2017</b>              | Motor performance measures. Offline motor behavior speeded motor performance and paced motor precision                                                      | n.a.                                                                                                                                                                                                                                                                                                                   |
| <b>Cocozza et al., 2018</b>              | Language, cognitive assessment, Executive, memory, visuoperception/visuospatial functions.                                                                  | Poor performance on MOCA. No language impairment. Except verbal working memory and categorization, FRDA performed worse than HC in tests assessing executive and attentive abilities.                                                                                                                                  |
| <b>Vavla et al., 2018</b>                | cognitive assessment tests                                                                                                                                  | Cognitive assessment in FRDA normal in 13 (out of 19), IDD in 2, borderline in 4. Non harmonic cognitive assessment profile.                                                                                                                                                                                           |
| <b>Shishegar et al., 2020</b>            | Digit span forward/backward tests, Hayling's sentence completion test, Stroop, TMTA/B.                                                                      | Executive functions (Stroop): FRDA worse than HC, Attentive functions: FRDA worse at f-up.                                                                                                                                                                                                                             |
| <b>Vavla et al., 2020</b>                | none                                                                                                                                                        | n.a.                                                                                                                                                                                                                                                                                                                   |
